# Supplementary material for: Reactivity of Atomically Functionalized C-Doped Boron Nitride Nanoribbons and Their Interaction with Organosulfur Compounds
Source: MDPI journal article supplement (doi:10.3390/nano9030452), 2019-03-18
Supplement: s1 [file s1]

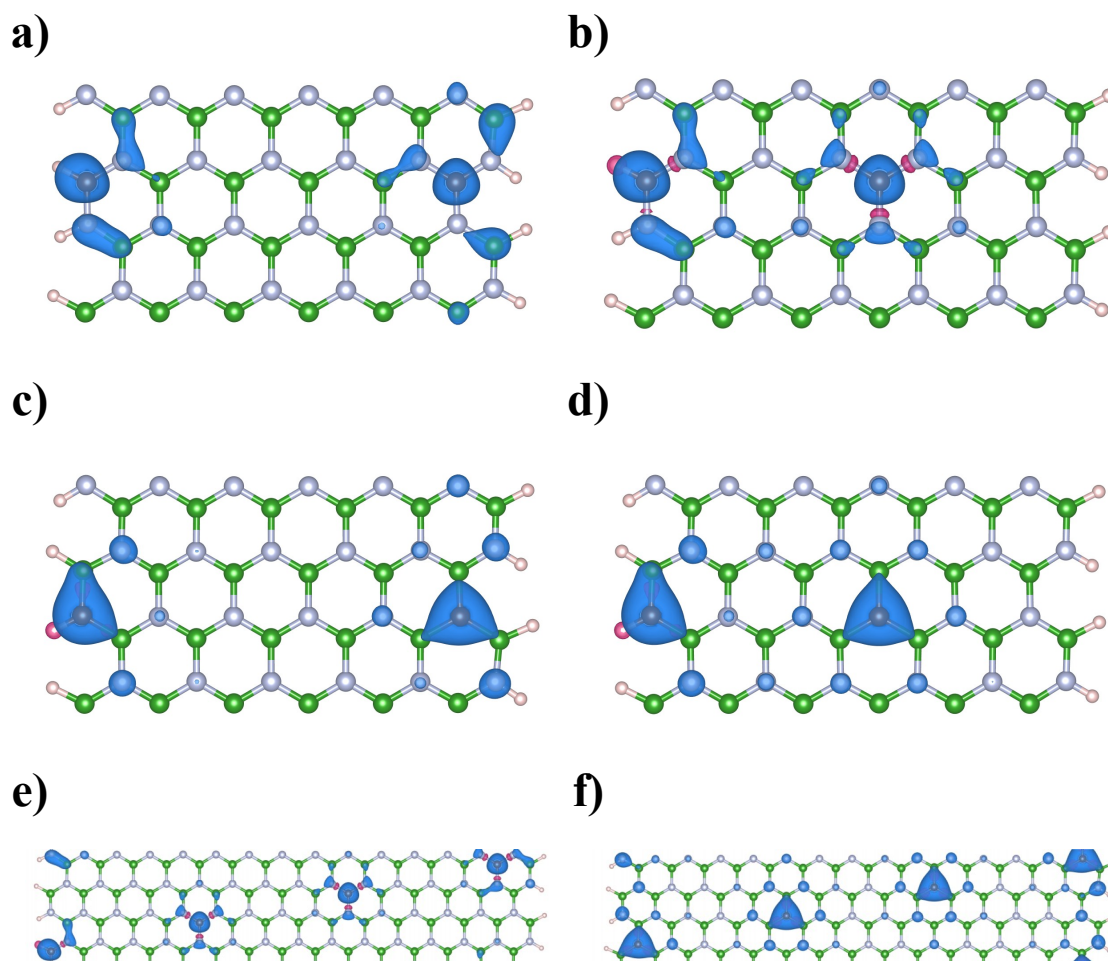

Figure S1 Spin density of the C-doped BNNRs: (a) BNNR\_BEBC, (b) BNNR\_BEBC, (c) BNNR\_NENE (d) BNNR\_NENC of size  $12 \times 2$ , (e) BNNR\_4B and (f) BNNR\_4N of size  $30 \times 2$ . Green, light blue, brown and pink spheres represent B, N, C and H respectively.

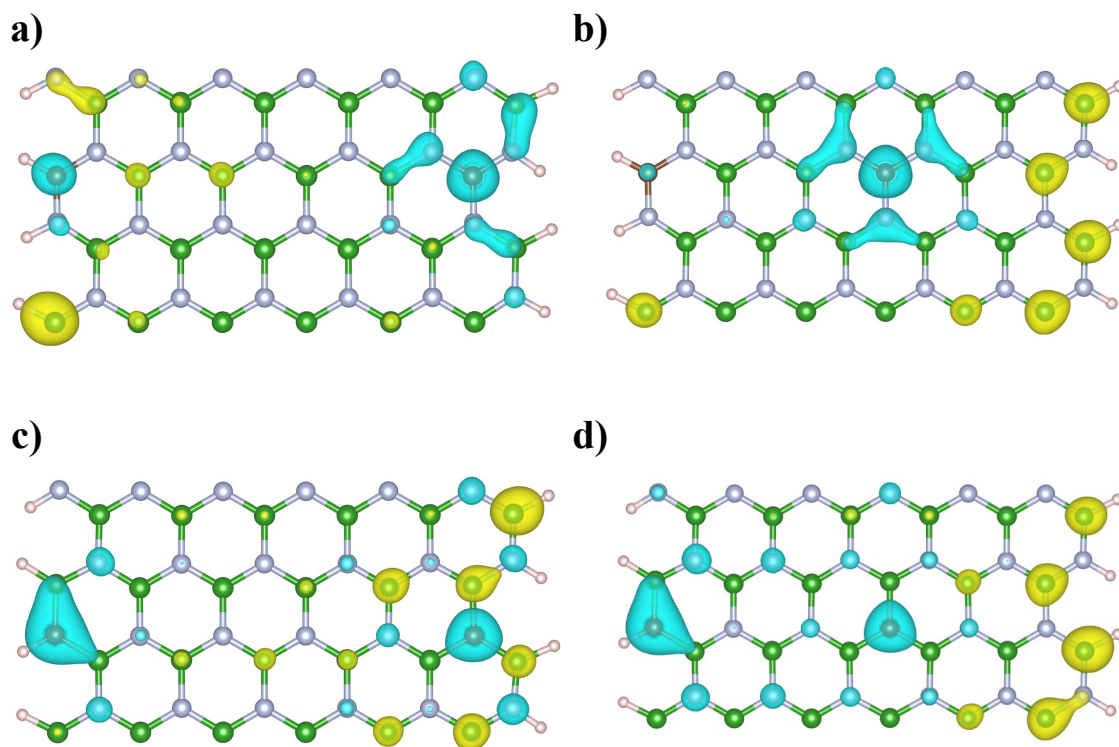

Figure S.2. Dual descriptor of the C-doped BNNRs (a) BNNR\_BEBC, (b) BNNR\_BEBC, (c) BNNR\_NENE and (d) BNNR\_NENC. Green, light blue, brown and pink spheres represent boron, nitrogen, carbon and hydrogen atoms respectively. The light blue lobes represent regions for nucleophilic attacks ( $f^2(r) > 0$ ) and the yellow lobes represent regions for electrophilic attacks ( $f^2(r) < 0$ ).

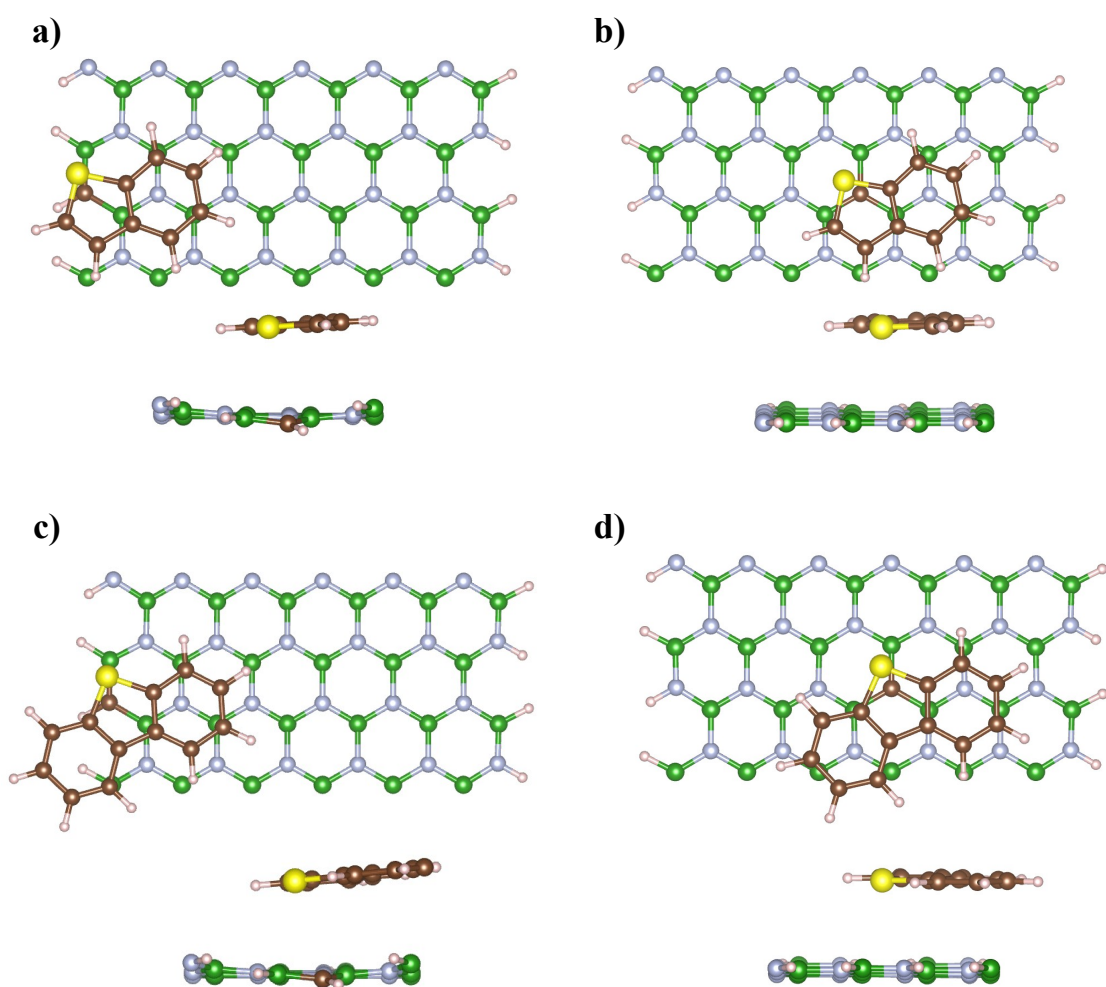

Figure S.3 (Color online): Complexes formed between B-Tio on the C-doped BNNRs (a) BNNR\_NE, (b) BNNR\_NC and the complexes formed between DBT on the C-doped BNNRs (c) BNNR\_NE and (d) BNNR\_NC respectively. Green, light blue, brown, yellow and pink spheres represent boron, nitrogen, carbon, sulfur and hydrogen atoms respectively.
